# Supplementary material
Source: MDPI journal article supplement (https://www.mdpi.com/2071-1050/13/6/3305)
Supplement: s1 [file s1]

Archive with 4 entries (4 files):
- DemoARPAID.mp4
- QDA_SVC_Analysis.pdf
- Test_Quiz.pdf
- ___ARPAID Investigation Data.xlsx
