# Supplementary material
Source: MDPI journal article supplement (https://www.mdpi.com/2071-1050/13/6/3305)
Supplement: s1 [file s1 › ___ARPAID Investigation Data.xlsx]

## Sheet: Pre-Test Quiz
PRE-TEST QUIZ - Partial & Total Scores
0: Control
1: Experimental
Group	Total Score (0-20)	P. 1 /1,00	P. 2 /1,00	P. 3 /1,00	P. 4 /1,00	P. 5 /1,00	P. 6 /1,00	P. 7 /1,00	P. 8 /1,00	P. 9 /1,00	P. 10 /1,00	P. 11 /1,00	P. 12 /1,00	P. 13 /1,00	P. 14 /1,00	P. 15 /1,00	P. 16 /1,00	P. 17 /1,00	P. 18 /1,00	P. 19 /1,00	P. 20 /1,00	Time
0	-	-	-	-	-	-	-	-	-	-	-	-	-	-	-	-	-	-	-	-	-	-
0	-	-	-	-	-	-	-	-	-	-	-	-	-	-	-	-	-	-	-	-	-	-
0	10.08	1	0.5	0	1	0	0	0.33	0	1	1	1	0.75	0.5	1	0	1	-	0	1	0	11 minutos 36 segundos
0	8.75	0	0.5	1	1	1	1	0.67	0	0	0	0.5	0.08	1	0	1	0	0	1	0	0	13 minutos 9 segundos
0	6.08	0	0.5	1	0	1	0	0.08	0	0.08	0	0.5	0.42	0.5	0	0	1	0	1	0	0	8 minutos 1 segundos
0	-	-	-	-	-	-	-	-	-	-	-	-	-	-	-	-	-	-	-	-	-	-
0	8	0	0.5	0	1	0	0	0.67	1	0.08	0.75	1	1	1	0	0	0	1	0	0	0	6 minutos 39 segundos
0	7.83	1	0.5	0	1	1	0	0.33	0	0.33	1	1	0.67	1	0	0	0	0	0	0	0	6 minutos 52 segundos
0	-	-	-	-	-	-	-	-	-	-	-	-	-	-	-	-	-	-	-	-	-	-
0	15.83	1	0	1	1	1	1	0.67	1	0.67	1	1	1	0.5	1	1	1	0	1	0	1	11 minutos 12 segundos
0	7.58	1	0.5	0	-	1	0	0.67	1	0.08	1	1	0.33	1	-	0	0	-	0	0	0	10 minutos 23 segundos
0	6.17	0	0.5	1	0	1	0	0.33	0	-	0	0	0.33	-	0	0	1	1	1	-	-	14 minutos 7 segundos
0	16.5	1	0.5	1	1	1	1	0.67	0	0.33	1	1	1	1	1	1	1	1	1	1	0	14 minutos
0	12.33	1	0.5	1	0	0	1	0.67	0	0.67	1	1	1	0.5	1	0	1	0	1	0	1	5 minutos 29 segundos
0	-	-	-	-	-	-	-	-	-	-	-	-	-	-	-	-	-	-	-	-	-	-
0	-	-	-	-	-	-	-	-	-	-	-	-	-	-	-	-	-	-	-	-	-	-
0	-	-	-	-	-	-	-	-	-	-	-	-	-	-	-	-	-	-	-	-	-	-
0	-	-	-	-	-	-	-	-	-	-	-	-	-	-	-	-	-	-	-	-	-	-
0	8.67	1	0.5	0	1	1	1	0.33	0	0.33	1	1	1	0.5	0	0	0	0	0	0	0	7 minutos 4 segundos
0	5.33	1	0.5	0	1	0	1	0.33	0	0.33	0	0.5	0.67	0	0	0	0	0	0	0	0	9 minutos 33 segundos
0	9.33	0	0.5	1	1	1	0	0	0	0.33	0	1	1	0.5	1	0	1	0	0	0	1	5 minutos 32 segundos
0	11	1	0.5	0	1	1	0	0.33	1	0.67	1	1	1	0.5	0	1	0	1	0	0	0	11 minutos 42 segundos
0	9.08	1	0.5	0	0	1	0	0.67	0	0.67	1	1	0.75	0.5	0	0	1	0	0	1	0	7 minutos 58 segundos
0	7.5	1	0.5	1	0	0	0	0.67	1	0.33	0	0.5	0	0.5	0	0	0	1	0	0	1	6 minutos 7 segundos
0	-	-	-	-	-	-	-	-	-	-	-	-	-	-	-	-	-	-	-	-	-	-
0	3.83	0	0.5	-	0	1	0	0.33	0	-	-	-	-	-	0	0	0	-	1	1	0	8 minutos 46 segundos
0	-	-	-	-	-	-	-	-	-	-	-	-	-	-	-	-	-	-	-	-	-	-
0	9.25	1	0.5	0	0	0	1	0.08	1	0.08	0.75	0.5	0.33	1	1	0	0	0	1	1	0	11 minutos 10 segundos
0	10.92	1	0.5	0	0	1	1	0.67	0	1	1	1	0.75	1	0	-	-	1	0	0	1	9 minutos 49 segundos
0	8.42	1	0.5	0	1	0	0	0.08	1	0.33	1	1	1	0.5	0	1	0	0	0	0	0	9 minutos 53 segundos
0	7.92	1	0.5	0	1	0	0	0.08	1	0.33	1	1	1	0	0	0	0	0	0	0	1	9 minutos 49 segundos
0	-	-	-	-	-	-	-	-	-	-	-	-	-	-	-	-	-	-	-	-	-	-
0	4.58	0	0.5	0	0	0	1	0.33	0	0.08	0.75	0.25	0.42	0.25	0	0	0	0	0	1	-	14 minutos 1 segundos
0	4.17	0	0.5	0	1	1	1	0.67	0	-	-	-	-	-	-	-	-	-	-	0	-	7 minutos 5 segundos
0	8.75	1	0.5	0	0	0	0	0.42	0	0.33	0	1	1	0.5	1	1	1	0	1	0	0	13 minutos 53 segundos
0	9.33	0	0.5	1	1	1	1	0.33	0	0	0	0.5	0	1	0	1	0	0	1	0	1	13 minutos 4 segundos
0	8	0	0.5	0	0	1	0	0.33	1	0.67	1	1	1	0.5	1	0	0	-	-	-	-	14 minutos 31 segundos
0	-	-	-	-	-	-	-	-	-	-	-	-	-	-	-	-	-	-	-	-	-	-
0	12.5	1	0	1	1	0	0	0.67	1	0.33	1	0.5	1	0	1	1	0	0	1	1	1	13 minutos 27 segundos
0	-	-	-	-	-	-	-	-	-	-	-	-	-	-	-	-	-	-	-	-	-	-
0	7.17	1	0	0	0	1	0	0	0	0.33	1	0.5	0.33	1	0	0	0	0	1	-	1	11 minutos
0	8.92	1	0.25	0	1	1	0	0.33	1	0.33	1	1	1	1	0	0	0	0	0	0	0	5 minutos 31 segundos
0	-	-	-	-	-	-	-	-	-	-	-	-	-	-	-	-	-	-	-	-	-	-
0	10.42	1	0	0	0	1	0	0.08	0	0.33	1	1	1	1	0	0	1	1	1	1	0	9 minutos 19 segundos
0	5.42	1	0.25	0	1	1	0	0.08	1	0.08	0	0	0	0	0	0	0	1	0	0	0	7 minutos 55 segundos
0	9	0	0.5	0	1	1	0	0.08	0	1	1	1	0.42	1	0	0	0	1	1	0	0	8 minutos 10 segundos
0	9.92	1	0.5	0	1	1	0	0.42	1	0.67	1	1	0.33	1	0	0	0	1	0	0	0	8 minutos 39 segundos
0	-	-	-	-	-	-	-	-	-	-	-	-	-	-	-	-	-	-	-	-	-	-
0	-	-	-	-	-	-	-	-	-	-	-	-	-	-	-	-	-	-	-	-	-	-
0	-	-	-	-	-	-	-	-	-	-	-	-	-	-	-	-	-	-	-	-	-	-
0	8.42	0	0.5	1	1	0	1	0.33	0	0	0	0.5	0.08	1	0	1	0	0	1	0	1	13 minutos 6 segundos
0	9.75	1	0.5	1	1	0	0	0.33	1	0.08	1	1	0.33	0.5	1	0	1	0	0	0	0	7 minutos 5 segundos
0	11.83	0	0.5	0	1	0	0	0.33	1	0.67	1	1	0.33	1	1	1	1	0	1	0	1	9 minutos 52 segundos
0	4.5	0	0	0	0	0	1	0.42	1	0	0.75	0	0.08	0.25	0	1	0	0	0	0	0	14 minutos
0	11	1	0.5	0	1	1	1	0.67	1	0.33	1	1	0	0.5	1	0	0	0	0	0	1	8 minutos 31 segundos
0	-	-	-	-	-	-	-	-	-	-	-	-	-	-	-	-	-	-	-	-	-	-
0	-	-	-	-	-	-	-	-	-	-	-	-	-	-	-	-	-	-	-	-	-	-
0	1.83	0	0.5	0	1	0	0	0.33	-	-	-	-	-	-	-	-	-	-	-	-	-	14 minutos 1 segundos
0	14.5	1	0.5	0	1	1	1	0.67	0	1	1	1	0.33	1	1	0	1	0	1	1	1	12 minutos 7 segundos
0	9.58	1	0.5	0	0	1	0	0.42	1	0.33	1	0.5	0.33	0.5	0	1	0	1	1	0	0	7 minutos 10 segundos
0	10.17	0	0.5	0	1	1	1	0.67	1	0.67	1	1	0.33	1	-	0	-	0	0	0	1	9 minutos 17 segundos
0	6.5	0	0.5	0	0	1	1	0.67	1	0.33	1	0	1	0	0	0	0	0	0	0	0	4 minutos 38 segundos
0	8.58	1	0.5	1	1	0	0	0.67	0	0.08	1	1	0.33	1	0	0	0	0	1	0	0	7 minutos 39 segundos
0	10.92	1	0.5	0	1	1	1	0.42	0	1	1	1	1	1	0	0	1	0	0	0	0	7 minutos 41 segundos
0	-	-	-	-	-	-	-	-	-	-	-	-	-	-	-	-	-	-	-	-	-	-
0	-	-	-	-	-	-	-	-	-	-	-	-	-	-	-	-	-	-	-	-	-	-
0	-	-	-	-	-	-	-	-	-	-	-	-	-	-	-	-	-	-	-	-	-	-
0	5	0	0	0	1	0	0	0.33	0	0.33	0	0.5	0.33	0.5	0	0	0	0	1	0	1	5 minutos 40 segundos
0	8.92	0	0.5	0	1	0	0	0.08	1	0.33	1	1	1	1	1	0	-	0	1	-	-	14 minutos
0	-	-	-	-	-	-	-	-	-	-	-	-	-	-	-	-	-	-	-	-	-	-
1	17.5	1	1	1	1	1	1	0.33	1	0.33	1	1	0.33	0.5	1	1	1	1	1	1	1	8 minutos 22 segundos
1	15.83	1	1	1	1	1	1	0.67	1	0.42	1	1	0.75	1	0	0	1	1	0	1	1	11 minutos 23 segundos
1	12.5	1	0.5	0	0	1	1	0.67	1	0.33	1	1	1	1	0	1	1	0	1	0	0	7 minutos 20 segundos
1	14	1	0.5	0	1	1	1	0.67	1	0.33	1	0.5	1	0	1	0	1	0	1	1	1	5 minutos 48 segundos
1	11.25	1	1	1	1	1	1	0.08	1	0.33	0	0	0.33	0.5	0	0	1	0	1	1	0	14 minutos
1	10.83	1	0.5	0	1	1	1	0.67	0	1	1	1	0.67	0	0	1	0	0	0	1	0	13 minutos 58 segundos
1	17.08	1	1	1	1	1	1	0.08	1	1	1	1	1	1	1	1	1	0	1	0	1	12 minutos 25 segundos
1	15.33	1	1	1	1	1	0	0.67	1	0.67	1	0.5	1	0.5	1	1	1	0	1	0	1	12 minutos 12 segundos
1	9.08	0	-	0	0	0	1	0.67	0	0.67	1	1	0.75	1	1	1	0	0	0	1	0	14 minutos
1	17.33	1	1	1	1	1	1	0.67	1	0.33	1	1	0.33	1	1	1	1	1	1	1	0	13 minutos 33 segundos
1	16.42	1	1	1	1	1	1	0.33	0	0.08	1	1	1	1	1	1	1	0	1	1	1	7 minutos 6 segundos
1	10.83	1	0.5	1	0	1	1	1	0	0.33	0	1	1	1	0	0	1	0	1	0	0	5 minutos 6 segundos
1	9.92	1	0	1	1	1	1	0.33	0	0.33	0	1	0.75	0.5	0	0	1	0	1	0	0	9 minutos 17 segundos
1	17.08	1	1	1	1	1	1	0.33	1	1	1	1	0.75	1	1	0	1	1	1	0	1	11 minutos 19 segundos
1	8.83	0	0.5	0	1	1	1	0.08	0	0.33	0.75	0.5	0.67	1	0	0	0	0	1	0	1	7 minutos 10 segundos
1	6.42	0	0	0	1	1	0	0.08	0	0.33	0	0.5	0	0.5	0	0	1	1	0	0	1	11 minutos 12 segundos
1	-	-	-	-	-	-	-	-	-	-	-	-	-	-	-	-	-	-	-	-	-	-
1	16	1	1	1	1	1	1	0.08	1	0.67	1	0.25	1	1	1	1	0	1	1	0	1	14 minutos 1 segundos
1	12.5	1	0	1	1	0	1	0.67	0	0.08	1	1	0.75	1	1	0	0	1	1	1	0	13 minutos 16 segundos
1	11.42	0	0	0	1	1	1	0.08	0	0.08	1	1	0.75	0.5	0	1	1	1	1	1	0	9 minutos 13 segundos
1	14.5	1	1	1	1	1	1	0.33	1	0.33	1	1	0.33	0.5	1	0	1	0	1	1	0	8 minutos 5 segundos
1	-	-	-	-	-	-	-	-	-	-	-	-	-	-	-	-	-	-	-	-	-	-
1	11.08	0	1	1	1	1	1	0.33	0	1	1	1	0.75	1	0	0	0	0	0	1	0	13 minutos 56 segundos
1	-	-	-	-	-	-	-	-	-	-	-	-	-	-	-	-	-	-	-	-	-	-
1	16.33	1	0.5	0	1	1	1	1	1	1	1	1	0.33	0.5	1	1	1	0	1	1	1	9 minutos 30 segundos
1	7.92	1	0.5	0	1	1	1	0.75	1	0.67	0	0	0	0	0	0	0	1	0	0	0	10 minutos 42 segundos
1	7.25	1	0	0	0	1	0	0.08	0	0.17	1	1	1	1	0	0	0	0	1	0	0	11 minutos 18 segundos
1	10.58	1	0.5	1	1	1	0	0.33	1	0.08	0	0	0.67	0	1	0	1	0	1	0	1	11 minutos 47 segundos
1	10.42	1	0.25	0	1	1	0	0.67	0	1	1	1	1	0.5	0	0	0	0	0	1	1	8 minutos 20 segundos
1	8.5	1	0.5	0	0	1	0	0.33	0	0	1	1	0.67	1	0	0	1	1	0	0	0	4 minutos 14 segundos
1	10.58	1	1	0	1	1	1	0.33	0	1	0.5	1	0.75	1	0	0	0	0	1	0	0	7 minutos 55 segundos
1	10.5	1	0.5	0	1	0	1	1	0	1	0	1	1	1	0	0	1	0	0	0	1	13 minutos 16 segundos
1	14.92	1	0.5	1	1	1	1	0.67	1	1	0.75	1	1	1	1	0	1	0	1	0	-	14 minutos
1	11.42	1	0.5	1	0	1	0	0.33	1	1	1	1	0.08	0.5	0	0	1	1	1	0	0	9 minutos 1 segundos
1	17	1	1	1	1	1	0	0.33	1	0.67	1	1	1	1	1	1	1	0	1	1	1	7 minutos 12 segundos
1	14	1	1	1	1	0	1	0.08	1	0.33	0.75	1	0.33	0.5	1	0	1	1	1	1	0	5 minutos 35 segundos
1	5	1	0.25	0	0	1	0	0.67	0	0.08	0	0	0	0	0	0	0	1	1	0	0	6 minutos 11 segundos
1	17.08	1	1	1	1	1	1	0.08	1	1	0	1	1	1	1	1	0	1	1	1	1	6 minutos 56 segundos
1	0	-	-	-	-	-	-	-	-	-	-	-	-	-	-	-	-	-	-	-	-	20 minutos 34 segundos
1	8.42	1	0.5	0	1	1	1	0.67	0	0.33	0.75	1	0.67	0.5	0	0	0	-	-	-	-	14 minutos 1 segundos
1	19.67	1	1	1	1	1	1	1	1	0.67	1	1	1	1	1	1	1	1	1	1	1	12 minutos 21 segundos
1	11.5	1	0.5	0	0	1	1	0.33	0	0.67	1	1	1	1	1	0	1	0	0	0	1	11 minutos 57 segundos
1	-	-	-	-	-	-	-	-	-	-	-	-	-	-	-	-	-	-	-	-	-	-
1	14.58	1	0.5	1	1	1	1	0.75	1	0.67	1	1	0.67	0	1	1	1	0	1	0	0	9 minutos 5 segundos
1	14.5	1	0.5	1	1	1	1	0.67	1	0	1	1	0.08	0.25	1	1	1	0	1	0	1	12 minutos 12 segundos
1	8.83	1	0.5	0	1	0	0	1	0	0.33	1	1	1	1	0	0	0	1	0	0	0	6 minutos 31 segundos
1	8.17	1	0.5	1	1	1	0	0	0	0.42	0.25	0.5	0	0.5	0	0	1	0	0	0	1	9 minutos 9 segundos
1	14.83	1	0.5	0	0	1	1	0.67	1	0.67	1	1	1	1	1	1	1	0	1	0	1	12 minutos 19 segundos
1	17.17	1	0.5	0	1	1	1	0.67	1	1	1	1	1	1	1	1	1	1	1	0	1	8 minutos 9 segundos
1	12.25	1	0.5	0	1	1	0	0.08	0	0.67	1	1	0	1	0	1	0	1	1	1	1	9 minutos 7 segundos
1	13.33	1	0.5	0	1	1	1	0.67	1	0.67	1	1	1	0.5	0	0	1	0	1	0	1	14 minutos
1	14.33	1	1	1	1	1	1	0.67	1	0.33	0	0.5	0.33	0.5	1	0	1	1	1	1	0	11 minutos 37 segundos
1	9.08	0	0	1	0	0	0	0.08	1	1	1	1	1	1	1	0	1	0	-	-	-	14 minutos
1	12.33	0	0.5	0	0	1	1	0.67	0	0.17	1	1	1	1	1	1	1	0	1	0	1	8 minutos 50 segundos
1	11.5	0	0.5	0	0	1	1	0.67	1	0.33	1	1	1	1	0	0	1	1	1	0	0	13 minutos 48 segundos
1	19.17	1	0.5	1	1	1	1	0.67	1	1	1	1	1	1	1	1	1	1	1	1	1	9 minutos 59 segundos
1	17.17	1	1	1	1	1	1	0	1	0.67	1	0.5	1	1	1	1	1	0	1	1	1	7 minutos 5 segundos
1	5.75	1	0	0	1	1	1	0.42	0	0.33	0	0.5	0	0.5	0	0	0	0	0	0	0	6 minutos 57 segundos
1	12.25	1	0.5	1	0	1	0	0.08	1	0.33	1	1	0.33	1	1	0	1	1	-	0	1	11 minutos 47 segundos
1	-	-	-	-	-	-	-	-	-	-	-	-	-	-	-	-	-	-	-	-	-	-
1	9.67	1	0.25	1	0	1	0	0.08	1	0.33	1	1	1	1	0	0	0	1	0	0	0	11 minutos 32 segundos
1	11.67	0	0	1	1	1	1	0.33	1	0	1	1	0.33	1	0	1	1	0	1	0	0	7 minutos 43 segundos
1	16.83	1	0.5	1	1	1	1	1	1	0.33	1	1	1	1	1	1	1	0	1	0	1	12 minutos 19 segundos
1	13.83	1	0.5	1	1	1	0	0.33	1	0.33	1	0.5	0.67	0.5	1	1	1	0	1	1	0	14 minutos
1	18.08	1	1	1	1	1	1	0.67	1	0.67	0.75	1	1	1	1	1	1	1	1	0	1	8 minutos 34 segundos
1	12.58	1	0.5	1	1	0	0	0.75	1	0.33	1	1	1	0	1	1	1	0	1	0	0	14 minutos
1	12.58	1	0.25	0	0	0	1	0.67	1	0.67	1	1	1	1	1	1	0	1	0	1	0	12 minutos 42 segundos
1	16.17	1	1	1	1	1	1	0.67	1	1	1	1	1	0.5	1	0	1	1	0	0	1	7 minutos 23 segundos
1	10	0	0.5	1	1	1	1	0.67	0	1	1	1	0.33	0.5	0	0	1	-	-	-	-	14 minutos
1	5.25	0	0.5	0	0	0	-	0.08	1	0.33	1	0.5	0.33	0.5	1	0	0	0	0	0	0	12 minutos 10 segundos
1	10.08	1	0.5	0	1	1	0	0.08	0	1	1	1	1	0.5	0	1	1	0	0	0	0	7 minutos 51 segundos
1	8.83	0	0.5	0	1	1	1	0.08	1	0.08	1	0	0.67	0.5	0	0	0	0	1	1	0	6 minutos 9 segundos
1	12.5	1	0.5	1	1	1	0	0.67	0	1	1	1	0.33	1	0	1	1	0	0	0	1	13 minutos 47 segundos
1	14.25	1	0	0	1	1	1	1	1	1	1	1	0.75	0.5	1	0	1	1	0	0	1	13 minutos 34 segundos
1	9.42	1	0.25	1	1	1	0	0.67	1	-	-	-	0	0.5	0	1	1	0	1	0	0	6 minutos 48 segundos
1	11.33	0	0.5	0	1	1	0	0.08	1	0.33	0.75	1	0.67	1	1	0	1	0	1	0	1	14 minutos
1	8.92	0	0.25	0	1	1	0	0.33	1	0.67	0	1	0.67	0	1	0	0	0	0	1	1	7 minutos 49 segundos
1	9.33	0	0.5	0	1	1	1	0.33	0	0.67	1	1	0.33	0.5	0	0	0	0	1	1	0	13 minutos 33 segundos
1	10.33	1	0.5	0	1	1	0	0.67	0	0	1	1	0.67	0.5	1	0	1	1	0	0	0	12 minutos 17 segundos
1	8.67	1	0	0	0	-	0	-	0	0.67	1	1	1	1	-	0	1	-	0	1	1	10 minutos 6 segundos
1	8.17	0	0.25	0	0	0	0	0.75	0	0.67	1	1	0.5	1	0	0	1	0	1	1	0	7 minutos 25 segundos
1	8	1	0	0	0	-	0	0.08	0	0.17	0.75	1	0.5	0.5	1	1	0	1	0	0	1	5 minutos 59 segundos
1	9.42	0	0	0	1	1	0	0.42	0	1	1	1	1	1	0	0	1	0	1	0	0	9 minutos 23 segundos

## Sheet: Post-Test Quiz
POST-TEST QUIZ - Partial & Total Scores
0: Control
1: Experimental
Group	Total Score (0-20)	P. 1 /1,00	P. 2 /1,00	P. 3 /1,00	P. 4 /1,00	P. 5 /1,00	P. 6 /1,00	P. 7 /1,00	P. 8 /1,00	P. 9 /1,00	P. 10 /1,00	P. 11 /1,00	P. 12 /1,00	P. 13 /1,00	P. 14 /1,00	P. 15 /1,00	P. 16 /1,00	P. 17 /1,00	P. 18 /1,00	P. 19 /1,00	P. 20 /1,00	Time
0	-	-	-	-	-	-	-	-	-	-	-	-	-	-	-	-	-	-	-	-	-	-
0	-	-	-	-	-	-	-	-	-	-	-	-	-	-	-	-	-	-	-	-	-	-
0	9.25	1	0.5	0	0	-	0	1	0	1	1	1	0.75	1	0	0	1	-	0	1	0	11 minutos 19 segundos
0	8	1	0.25	0	1	1	1	0.33	0	0.33	0	0.5	0.08	0.5	1	0	0	0	1	0	0	12 minutos 57 segundos
0	-	-	-	-	-	-	-	-	-	-	-	-	-	-	-	-	-	-	-	-	-	-
0	-	-	-	-	-	-	-	-	-	-	-	-	-	-	-	-	-	-	-	-	-	-
0	15.5	1	0.5	1	1	0	1	0.67	1	0.33	1	1	1	1	1	0	1	0	1	1	1	14 minutos 1 segundos
0	13	1	1	0	0	1	0	0.33	1	0.33	1	1	0.33	1	1	1	1	0	0	1	1	10 minutos 53 segundos
0	-	-	-	-	-	-	-	-	-	-	-	-	-	-	-	-	-	-	-	-	-	-
0	18.33	1	0.5	1	1	1	1	0.67	1	0.67	1	1	1	0.5	1	1	1	1	1	1	1	8 minutos 5 segundos
0	12.5	1	0.5	1	0	1	1	0.33	1	0.33	1	0.5	0.33	0.5	0	1	1	-	1	0	1	11 minutos 51 segundos
0	11.92	1	0.5	0	0	1	1	0.08	1	0.17	1	1	0.67	0.5	1	0	1	0	1	0	1	13 minutos 18 segundos
0	20	1	1	1	1	1	1	1	1	1	1	1	1	1	1	1	1	1	1	1	1	9 minutos 34 segundos
0	16.67	1	0.5	1	1	1	1	0.67	1	1	1	1	1	0.5	1	1	1	0	1	0	1	5 minutos 1 segundos
0	-	-	-	-	-	-	-	-	-	-	-	-	-	-	-	-	-	-	-	-	-	-
0	-	-	-	-	-	-	-	-	-	-	-	-	-	-	-	-	-	-	-	-	-	-
0	-	-	-	-	-	-	-	-	-	-	-	-	-	-	-	-	-	-	-	-	-	-
0	-	-	-	-	-	-	-	-	-	-	-	-	-	-	-	-	-	-	-	-	-	-
0	10.67	1	0.5	0	0	1	1	0.67	0	0.33	1	1	0.67	0.5	0	0	1	0	1	0	1	13 minutos 4 segundos
0	9.83	1	0.5	0	1	1	1	0.67	0	0.33	1	1	0.33	1	1	0	0	0	0	0	0	14 minutos 15 segundos
0	10.5	1	0.5	1	0	-	0	0.67	-	0.33	1	1	-	1	1	1	1	0	1	0	-	14 minutos 1 segundos
0	14.67	1	0.5	0	1	1	0	1	1	0.67	1	0.5	1	0	1	1	1	0	1	1	1	8 minutos 28 segundos
0	9.83	1	0.5	-	0	1	0	0.08	0	1	1	1	0.75	0.5	-	0	1	-	0	1	1	10 minutos 7 segundos
0	15.08	1	1	1	1	0	0	0.08	0	1	1	1	1	1	1	1	1	0	1	1	1	5 minutos 37 segundos
0	-	-	-	-	-	-	-	-	-	-	-	-	-	-	-	-	-	-	-	-	-	-
0	9.17	1	1	0	0	1	0	0.08	1	0	0	0.5	0.33	0.25	0	1	0	-	1	1	1	9 minutos 8 segundos
0	-	-	-	-	-	-	-	-	-	-	-	-	-	-	-	-	-	-	-	-	-	-
0	8.58	1	0.5	0	1	1	0	0.08	1	0.33	0	1	0.67	1	1	0	0	0	0	0	0	12 minutos 14 segundos
0	17.33	1	1	1	1	1	0	0.67	1	0.67	1	1	1	1	1	1	1	0	1	1	1	10 minutos 4 segundos
0	9.17	1	0.5	0	0	0	0	0.67	1	0.33	1	0.5	0.67	0.5	1	0	0	1	0	0	1	12 minutos 17 segundos
0	11.75	1	0.5	0	1	1	0	0.33	1	0.33	1	1	0.33	0.25	0	1	0	1	0	1	1	13 minutos 37 segundos
0	-	-	-	-	-	-	-	-	-	-	-	-	-	-	-	-	-	-	-	-	-	-
0	0	-	-	-	-	-	-	-	-	-	-	-	-	-	-	-	-	-	-	-	-	17 minutos 43 segundos
0	13.92	1	0.5	1	1	1	1	1	1	0.67	0.5	0.5	0.25	0.5	0	1	1	0	1	0	1	6 minutos 17 segundos
0	10.67	1	0.5	0	0	1	0	0.67	0	1	1	1	0.5	1	1	1	1	0	0	0	0	6 minutos 28 segundos
0	9.17	1	0.5	0	0	1	0	0.33	0	0.33	1	1	0	1	1	1	0	0	1	0	0	12 minutos 58 segundos
0	13.5	1	0.5	1	1	0	0	0.67	0	0.33	1	1	1	1	1	1	1	0	1	0	1	7 minutos 32 segundos
0	-	-	-	-	-	-	-	-	-	-	-	-	-	-	-	-	-	-	-	-	-	-
0	18.33	1	1	1	1	1	1	1	1	0.33	1	0.5	1	0.5	1	1	1	1	1	1	1	6 minutos 27 segundos
0	-	-	-	-	-	-	-	-	-	-	-	-	-	-	-	-	-	-	-	-	-	-
0	8.5	1	0.5	0	1	0	0	0.33	0	0.33	1	0.5	0.33	0.5	0	-	1	-	1	1	0	3 minutos 37 segundos
0	9	1	0.5	-	1	1	0	0.33	1	0.17	1	0	1	0	1	1	0	0	0	0	0	10 minutos 29 segundos
0	-	-	-	-	-	-	-	-	-	-	-	-	-	-	-	-	-	-	-	-	-	-
0	14.58	1	0.5	1	0	1	1	0.42	0	0.67	0	1	1	1	1	0	1	1	1	1	1	10 minutos 54 segundos
0	15.08	1	0.5	0	1	1	1	0.67	1	0.33	1	1	0.08	0.5	0	1	1	1	1	1	1	9 minutos 19 segundos
0	10.5	1	0.5	0	1	0	1	0.67	0	1	1	1	0.08	0.25	0	1	1	1	0	0	0	4 minutos 47 segundos
0	12.42	1	0.5	1	1	0	0	0.67	1	1	1	0.25	0.5	0.5	1	1	1	0	0	0	1	5 minutos 58 segundos
0	-	-	-	-	-	-	-	-	-	-	-	-	-	-	-	-	-	-	-	-	-	-
0	-	-	-	-	-	-	-	-	-	-	-	-	-	-	-	-	-	-	-	-	-	-
0	-	-	-	-	-	-	-	-	-	-	-	-	-	-	-	-	-	-	-	-	-	-
0	8.5	0	0.5	0	1	1	1	0.33	0	0.33	1	0.5	0.33	0.5	1	1	0	0	0	0	0	13 minutos 1 segundos
0	11.83	1	0.5	0	1	1	0	0	1	0.33	1	1	1	1	0	0	1	0	0	1	1	7 minutos 28 segundos
0	17.67	1	0.5	1	1	1	1	1	1	0.67	1	0.5	1	0	1	1	1	1	1	1	1	8 minutos 30 segundos
0	2.5	0	0	0	0	0	1	0.08	0	0.08	0.75	0.25	0.08	0.25	0	0	0	0	0	0	0	4 minutos 5 segundos
0	14.83	1	0.5	0	0	1	1	1	1	0.33	1	1	1	1	1	1	1	0	1	1	0	8 minutos 11 segundos
0	-	-	-	-	-	-	-	-	-	-	-	-	-	-	-	-	-	-	-	-	-	-
0	-	-	-	-	-	-	-	-	-	-	-	-	-	-	-	-	-	-	-	-	-	-
0	11.17	1	0.5	0	1	1	1	1	0	0.67	0.5	0.5	-	0	1	-	0	1	1	1	0	7 minutos 33 segundos
0	15.25	1	0.5	0	1	1	1	1	0	1	1	1	0.75	1	1	1	1	0	0	1	1	8 minutos 7 segundos
0	9.5	1	0.5	0	0	0	0	0.33	1	0.33	1	0.5	0.33	0.5	1	1	0	1	1	0	0	6 minutos 33 segundos
0	17.17	1	0.5	0	1	1	1	0.67	0	1	1	1	1	1	1	1	1	1	1	1	1	8 minutos 50 segundos
0	7.5	0	0.5	0	0	1	0	0.67	1	0.33	1	0	1	0	0	0	1	1	0	0	0	5 minutos 31 segundos
0	12.25	1	0.5	0	0	1	1	0.67	0	0.08	1	1	1	1	1	0	1	0	1	0	1	13 minutos 19 segundos
0	11.5	1	0.5	0	1	1	0	1	0	1	1	1	0.5	0.5	0	0	1	0	1	1	0	6 minutos 8 segundos
0	-	-	-	-	-	-	-	-	-	-	-	-	-	-	-	-	-	-	-	-	-	-
0	-	-	-	-	-	-	-	-	-	-	-	-	-	-	-	-	-	-	-	-	-	-
0	-	-	-	-	-	-	-	-	-	-	-	-	-	-	-	-	-	-	-	-	-	-
0	13.58	1	0.5	0	1	1	0	0.08	1	0.67	1	1	0.33	1	0	1	1	1	1	0	1	12 minutos 25 segundos
0	7	-	0.5	1	1	1	0	0.67	-	0.33	-	-	0	0.5	0	0	1	0	1	0	0	14 minutos 1 segundos
0	-	-	-	-	-	-	-	-	-	-	-	-	-	-	-	-	-	-	-	-	-	-
1	17.67	1	1	1	1	1	1	1	1	0.33	1	1	0.33	1	0	1	1	1	1	1	1	7 minutos 21 segundos
1	13.17	1	0.5	0	1	1	1	0.33	0	1	1	1	0.33	1	0	0	1	1	1	1	0	6 minutos 48 segundos
1	18	1	0.5	1	1	1	1	1	1	1	1	1	1	0.5	1	1	1	1	1	0	1	5 minutos 31 segundos
1	17.67	1	0.5	1	1	1	1	1	1	1	1	1	0.67	0.5	1	1	1	0	1	1	1	7 minutos 18 segundos
1	11.67	1	1	1	1	1	1	0.33	1	0.33	0	0	0	0	1	0	1	1	1	0	0	9 minutos 43 segundos
1	16.33	1	1	1	1	1	0	1	0	0.33	1	1	1	1	1	1	1	0	1	1	1	12 minutos 16 segundos
1	18.5	1	0.5	1	1	1	1	1	1	1	1	1	1	1	1	1	1	0	1	1	1	10 minutos 13 segundos
1	18.75	1	1	1	1	1	1	1	1	1	1	1	0.75	1	1	1	1	0	1	1	1	11 minutos 43 segundos
1	19.67	1	1	1	1	1	1	1	1	0.67	1	1	1	1	1	1	1	1	1	1	1	6 minutos 30 segundos
1	13.25	1	0.5	1	0	1	0	1	1	0.67	1	1	0.08	1	1	0	1	1	1	0	0	11 minutos 57 segundos
1	15.5	1	0.5	1	1	0	1	1	1	0.67	1	0.5	0.33	0.5	1	1	1	0	1	1	1	7 minutos 15 segundos
1	12.83	1	0.5	1	1	1	1	0.67	1	0.33	1	0.5	0.33	0.5	0	0	1	0	1	0	1	4 minutos 20 segundos
1	17.08	1	0.5	1	1	1	1	0.33	1	1	1	1	1	0.25	1	1	1	0	1	1	1	8 minutos 54 segundos
1	11	1	0.5	0	0	0	1	1	0	1	1	1	0	0.5	1	0	1	0	1	0	1	5 minutos 39 segundos
1	14.67	1	1	0	1	1	1	1	1	0.33	0.75	0.5	0.08	1	1	1	0	1	1	0	1	4 minutos 44 segundos
1	7.58	1	0.5	0	0	1	0	0.67	1	0.33	0	0	0.08	0	1	0	1	0	1	0	0	6 minutos
1	-	-	-	-	-	-	-	-	-	-	-	-	-	-	-	-	-	-	-	-	-	-
1	7.67	1	0	0	0	1	0	0.67	1	0	1	0.5	1	0.5	0	0	0	0	1	0	0	7 minutos 47 segundos
1	15.67	1	0.5	1	1	1	1	0.08	1	1	1	1	0.08	1	1	1	1	0	1	0	1	13 minutos 11 segundos
1	12.08	1	1	1	0	0	0	0.42	0	0.67	1	1	1	1	0	0	1	1	1	1	0	6 minutos 11 segundos
1	12.42	1	1	1	1	1	1	1	0	0.33	0.75	0	0.33	1	0	0	1	0	1	1	0	10 minutos 48 segundos
1	-	-	-	-	-	-	-	-	-	-	-	-	-	-	-	-	-	-	-	-	-	-
1	14.08	1	0.5	1	1	0	0	0.08	1	0.75	1	1	0.75	1	1	1	1	0	1	0	1	5 minutos 30 segundos
1	-	-	-	-	-	-	-	-	-	-	-	-	-	-	-	-	-	-	-	-	-	-
1	18.5	1	0.5	1	1	1	1	1	1	1	1	1	1	1	1	1	1	0	1	1	1	5 minutos 48 segundos
1	16.75	1	0.5	0	1	1	1	1	1	1	1	1	0.75	0.5	1	1	1	0	1	1	1	10 minutos 24 segundos
1	6.83	0	0.5	1	0	1	1	0.33	1	0	0	0	0	0	0	0	0	1	1	0	0	1 minutos 11 segundos
1	12.83	1	0.5	0	0	1	0	0.33	1	1	1	0	1	1	1	1	0	1	1	0	1	7 minutos 5 segundos
1	13.58	1	0.5	0	1	1	0	0.42	1	0.67	1	1	1	1	1	0	1	0	1	0	1	6 minutos 54 segundos
1	12.5	1	0.5	1	1	1	1	0.67	1	0	1	0.5	0.33	0.5	0	0	1	0	1	0	1	7 minutos 55 segundos
1	8	1	0	1	1	0	0	1	0	0.67	1	0	0.33	1	0	0	0	0	1	0	0	4 minutos 43 segundos
1	18.5	1	0.5	1	1	1	1	1	1	1	1	1	1	1	1	1	1	0	1	1	1	5 minutos 31 segundos
1	20	1	1	1	1	1	1	1	1	1	1	1	1	1	1	1	1	1	1	1	1	6 minutos 47 segundos
1	10.5	1	0.5	0	0	0	0	0.67	0	1	1	1	0.33	1	0	0	1	1	1	0	1	9 minutos 31 segundos
1	11.67	1	1	0	1	1	0	0.33	1	0.33	1	1	1	1	0	0	0	0	1	1	0	12 minutos 18 segundos
1	16.67	1	1	1	1	1	1	1	1	0.33	1	0.5	0.33	0.5	1	1	1	0	1	1	1	7 minutos 46 segundos
1	5.67	1	0.5	0	0	1	0	0.08	0	0.67	0	0	0.42	0	1	0	0	0	1	0	0	4 minutos 28 segundos
1	8.83	0	0.5	0	0	1	0	0.67	0	0.33	1	1	0.33	1	1	0	1	0	1	0	0	11 minutos 47 segundos
1	9.33	1	0.5	1	1	1	0	0.33	1	0	1	0.5	0	0	0	0	1	0	1	0	0	4 minutos 12 segundos
1	10.67	-	0.5	0	1	1	-	0.67	1	0.33	1	1	0.67	0.5	1	0	1	0	-	1	-	14 minutos
1	20	1	1	1	1	1	1	1	1	1	1	1	1	1	1	1	1	1	1	1	1	9 minutos 18 segundos
1	12.83	1	0.5	0	1	1	0	0.67	1	0.67	1	1	1	1	0	0	1	0	1	0	1	8 minutos 18 segundos
1	-	-	-	-	-	-	-	-	-	-	-	-	-	-	-	-	-	-	-	-	-	-
1	10.5	1	0.5	1	0	1	1	0.33	1	0.33	0	0.5	0.33	0.5	0	1	1	0	1	0	0	4 minutos 23 segundos
1	15.5	1	0.5	0	1	1	1	1	0	0.33	1	1	0.67	1	1	1	1	0	1	1	1	10 minutos 55 segundos
1	12.17	1	0.5	1	1	1	0	1	1	0.67	1	0	1	0	1	0	1	0	1	0	0	5 minutos 57 segundos
1	13.33	1	0	1	0	1	1	1	0	0.67	0.25	1	0.42	1	1	0	1	0	1	1	1	6 minutos 15 segundos
1	17.5	1	0.5	1	1	1	1	1	1	1	0	1	1	1	1	1	1	0	1	1	1	11 minutos 9 segundos
1	15.83	1	1	0	1	0	1	0.67	1	0.67	1	0.5	1	1	1	1	1	0	1	1	1	8 minutos 20 segundos
1	14.67	1	0.5	0	1	1	0	0.67	1	1	1	1	1	0.5	1	1	1	0	1	1	0	8 minutos 57 segundos
1	14.33	1	0.5	0	1	1	1	0.67	1	0.67	1	1	1	0.5	1	0	1	0	1	0	1	10 minutos 19 segundos
1	-	-	-	-	-	-	-	-	-	-	-	-	-	-	-	-	-	-	-	-	-	-
1	10.75	0	0	0	0	1	0	0.33	1	1	1	1	0.42	0	1	1	1	0	1	0	1	13 minutos 47 segundos
1	14.83	1	0.5	0	0	1	0	1	1	1	1	1	0.33	1	1	1	1	1	1	0	1	5 minutos 37 segundos
1	12.83	1	0.5	0	1	0	0	0.33	1	1	1	1	1	1	1	0	1	0	1	0	1	13 minutos 12 segundos
1	8.83	1	0.5	0	0	0	0	0.67	0	0.67	1	1	1	1	0	0	1	0	0	1	0	11 minutos 4 segundos
1	9.5	0	0.5	0	1	0	0	0.67	1	0.33	1	1	1	1	0	0	0	0	1	1	0	8 minutos 24 segundos
1	11.08	1	0.5	0	1	1	1	0.08	1	0.67	0.75	1	0.08	1	0	0	1	0	1	0	0	13 minutos 34 segundos
1	16	1	1	1	1	1	1	0.67	0	0.33	1	1	1	1	1	0	1	0	1	1	1	7 minutos 1 segundos
1	-	-	-	-	-	-	-	-	-	-	-	-	-	-	-	-	-	-	-	-	-	-
1	10.83	1	0.5	0	1	1	0	0.67	0	0.67	1	1	1	1	1	0	1	0	0	0	0	7 minutos 28 segundos
1	12.5	1	0.5	1	1	1	0	0.33	0	0.67	1	1	1	1	0	0	1	1	1	0	0	5 minutos 33 segundos
1	12	1	0.5	0	0	1	1	0.33	0	0.67	1	1	0.5	1	1	0	1	0	1	0	1	3 minutos 51 segundos
1	15.42	1	1	1	1	0	1	0.75	1	0.67	1	1	1	1	1	0	1	0	1	0	1	9 minutos 31 segundos
1	15	1	1	1	1	1	0	0.67	1	1	1	1	0.33	1	0	1	1	0	1	0	1	8 minutos 33 segundos
1	13.67	1	1	1	0	1	0	1	0	0.67	1	1	1	1	1	0	1	0	1	0	1	9 minutos 11 segundos
1	10.33	1	0	0	1	0	0	0.67	0	0.67	1	0	1	0	0	1	1	1	1	0	1	8 minutos 28 segundos
1	16.83	1	0.5	0	1	1	1	1	1	0.33	1	0.5	1	0.5	1	1	1	1	1	1	1	6 minutos 16 segundos
1	11.75	1	0.5	0	0	1	1	0.67	1	1	1	1	0.08	0.5	1	1	1	0	0	0	0	12 minutos 1 segundos
1	0	-	-	-	-	-	-	-	-	-	-	-	-	-	-	-	-	-	0	-	-	27 minutos 55 segundos
1	13.08	1	0.5	1	1	1	0	0.08	1	1	1	1	1	0.5	0	1	1	0	0	0	1	5 minutos 56 segundos
1	19.25	1	0.5	1	1	1	1	1	1	1	0.75	1	1	1	1	1	1	1	1	1	1	9 minutos 23 segundos
1	11.5	1	0.5	1	0	0	0	1	0	1	1	1	1	0	1	0	1	0	1	0	1	13 minutos 50 segundos
1	15.92	1	0.5	1	1	0	1	1	1	0.67	1	1	0.75	1	1	1	1	1	0	0	1	11 minutos 3 segundos
1	17.58	1	0.5	1	1	1	1	0.67	1	0.67	0.75	1	1	1	1	1	1	1	0	1	1	7 minutos 34 segundos
1	13.25	1	0.5	0	1	0	1	1	1	0.17	1	1	0.08	0.5	1	0	1	1	1	1	0	13 minutos 59 segundos
1	-	-	-	-	-	-	-	-	-	-	-	-	-	-	-	-	-	-	-	-	-	-
1	16.33	1	0.5	1	1	1	1	0.33	1	0.67	1	1	0.33	0.5	1	1	1	0	1	1	1	10 minutos 28 segundos
1	14.08	1	0.5	1	0	1	1	0.75	1	0.17	1	1	0.67	1	1	1	0	0	0	1	1	9 minutos 46 segundos
1	17	1	0	1	1	1	1	0.67	1	0.33	1	1	0	1	1	1	1	1	1	1	1	9 minutos 21 segundos
1	10.83	1	0.5	1	1	1	0	1	1	0.33	1	0.5	0.5	0	0	0	1	0	0	0	1	10 minutos 54 segundos
1	9.83	1	0	0	1	0	0	0.67	1	0.67	1	0	0.5	0	1	1	1	1	0	0	0	7 minutos 50 segundos
1	-	-	-	-	-	-	-	-	-	-	-	-	-	-	-	-	-	-	-	-	-	-

## Sheet: Assembly Exercises
PRACTICAL EXERCISES - Scores
0: Control
1: Experimental
	Pre-Experiment	Post-Experiment
Group	Spacer Assembly	Eyebolt Assembly	Bit-holder Assembly	Examination Assembly
1	4	8	6.5	9
1	6	9	8	9
1	-	-	-	6.5
1	5.5	5.5	6	7.25
1	4	6.75	8	5
1	4	6	7.5	7				Bit-holder Assembly	Eyebolt Assembly	Examination Assembly		Control Group	Experimental Group
1	4	-	-	-
1	4	10	8.5	9
1	5.5	4	6	-
1	-	-	-	-
1	5.5	7.5	9	3.5
1	5	6.5	9	6
1	5.5	7.5	7.5	4
1	7	10	9	7.25
1	5	8	3	7
1	-	-	-	7
1	7	10	10	9.5
1	6.5	9.5	9.5	6.75
1	7.5	6	9	8
1	7.5	5	3	8
1	7	9	7	9
1	7	7.5	8.5	9
1	7	7	9	9.75
1	7	7.5	9	9.75
1	5.5	8	9	7
1	7	9	9	7.5
1	6	9.5	9	9
1	5	8	8	5
1	4	7	9	8.5
1	6	7	9	8
1	6	9	10	9
1	5	6	9	3.5
1	-	-	-
1	7	9.5	10	9.75
1	6	7	10	8.5
1	5	9	10	8.5
1	4	9	9	7
1	-	-	-	-
1	5	5	9	6.5
1	-	-	-	-
1	5	7	10	9.5
1	7.5	7	9	9.5
1	5	5.5	7	4
1	3.5	8	9	6.5
1	5	7	9.5	8
1	7	5	10	7
1	4	5	10	6.75
1	9.5	9	10	9.75
1	6	9	9.5	9
1	3	6	8	6.5
1	4	7	9.5	8.25
1	6	8	9.5	8.25
1	-	8	8	6
1	6	8.5	10	7.25
1	6.5	9	9	8
1	7	9	9.5	7.25
1	8.5	7.5	6	9
1	4	6	9	6.5
1	-	-	-	-
1	4	8	6	5.25
1	9	8	10	8.5
1	5	6	9	9.75
1	7	9	9	9.75
1	6	8	9.5	7.5
1	9	6	10	9.5
1	6	6.5	10	9
1	5	7	9	6.5
1	6	7	6	-
1	4	7	9	6
1	5.5	7	9.5	8.75
1	7	6	9	6.75
1	6.5	8.5	8	6.25
1	5	8.5	8	6
1	3	3.5	3	2.5
1	7.5	9	10	9.5
1	-	-	-	-
1	4	6.5	6	6.5
1	5	5	10	4
1	6	6	10	9.25
1	9	8	7	9.5
1	5.5	6	9	6
1	5	6	9	8.75
1	-	5	8	8
0	5	5	7	4
0	-	-	-	-
0	-	-	-	-
0	5	9	9	6
0	-	-	-	-
0	-	-	-	-
0	6	6	9.5	2
0	5.5	5	9.5	5
0	-	-	-	-
0	6.5	5.5	10	7
0	6	9	10	4
0	6.5	10	8	5
0	6	5	9	6.5
0	4	5	9	9
0	-	-	-	-
0	-	-	-	-
0	-	-	-	3.5
0	6.5	-	-	-
0	8	5	5	3
0	5	5	6	7
0	6	5	9.5	4
0	7	8.5	10	5
0	-	7	7.5	7
0	3	-	-	-
0	-	-	-	-
0		-	-	3.5
0	-	-	-	-
0	5	5	-	6
0	5	-	5	9
0	5	9.5	8	3.5
0	5.5	3	8	5.5
0	-	-	-	-
0	5	5	9	3.5
0	6	5	9.5	8
0	2	-	7	6
0	5	9.5	10	4
0	-	3	5	6
0	1	-	-	-
0	4	3	3	4
0	-	-	-	-
0	5	7	7	6
0	6	3	3	9
0	-	-	-	-
0	5	5	4	3.5
0	-	6	8	6.5
0	-	5	5	4
0	7	7	9	7
0	-	-	-	-
0	-	-	-	-
0	-	-	-	-
0	5	9.5	10	4
0	6	7	9	3.5
0	5	5	5	4
0	5	-	-	2.5
0	5	6	8	4
0	1	-	-	-
0	-	-	-	-
0	5	5	9	8.5
0	6	7	9.5	5
0	-	5	8	4
0	4	6	9	6.5
0	-	-	-	-
0	5	5	5	7
0	-	-	-	-
0	-	-	-
0	-	-	-	-
0	-	-	-	-
0	4	3	6	-
0	5	5	5	6.5
0	-	-	-	-
	Mean	Bit-holder Assembly	Eyebolt Assembly	Examination Assembly
	Control Group	7.575	5.88462	5.31395
	Experimental Group	8.50676	7.3277	7.50676
		5.88462	7.575	5.31395		7.3277	8.50676	7.50676
		3	3	2		3.5	3	2.5
		3	3	2.5		4	3	3.5
		3	4	3		5	3	3.5
		3	5	3.5		5	6	4
		3	5	3.5		5	6	4
		5	5	3.5		5	6	4
		5	5	3.5		5	6	5
		5	5	3.5		5	6	5
		5	5	3.5		5.5	6	5.25
		5	5	4		5.5	6.5	6
		5	6	4		6	7	6
		5	6	4		6	7	6
		5	7	4		6	7	6
		5	7	4		6	7.5	6
		5	7	4		6	7.5	6.25
		5	7.5	4		6	8	6.5
		5	8	4		6	8	6.5
		5	8	4		6	8	6.5
		5	8	4		6	8	6.5
		5	8	5		6	8	6.5
		5	8	5		6	8	6.5
		5	8	5		6.5	8	6.5
		5.5	9	5		6.5	8	6.75
		6	9	5.5		6.5	8.5	6.75
		6	9	6		6.75	8.5	6.75
		6	9	6		7	9	7
		6	9	6		7	9	7
		7	9	6		7	9	7
		7	9	6		7	9	7
		7	9	6.5		7	9	7
		7	9.5	6.5		7	9	7
		7	9.5	6.5		7	9	7.25
		8.5	9.5	6.5		7	9	7.25
		9	9.5	7		7	9	7.25
		9	9.5	7		7	9	7.25
		9.5	10	7		7	9	7.5
		9.5	10	7		7	9	7.5
		9.5	10	7		7.5	9	8
		10	10	8		7.5	9	8
		-	10	8.5		7.5	9	8
		-	-	9		7.5	9	8
		-	-	9		7.5	9	8
		-	-	9		8	9	8
		-	-	-		8	9	8.25
		-	-	-		8	9	8.25
		-	-	-		8	9	8.5
		-	-	-		8	9	8.5
		-	-	-		8	9	8.5
		-	-	-		8	9	8.5
		-	-	-		8	9	8.75
		-	-	-		8	9.5	8.75
		-	-	-		8	9.5	9
		-	-	-		8	9.5	9
		-	-	-		8.5	9.5	9
		-	-	-		8.5	9.5	9
		-	-	-		8.5	9.5	9
		-	-	-		9	9.5	9
		-	-	-		9	9.5	9
		-	-	-		9	10	9
		-	-	-		9	10	9
		-	-	-		9	10	9
		-	-	-		9	10	9.25
		-	-	-		9	10	9.5
		-	-	-		9	10	9.5
		-	-	-		9	10	9.5
		-	-	-		9	10	9.5
		-	-	-		9	10	9.5
		-	-	-		9	10	9.5
		-	-	-		9.5	10	9.75
		-	-			9.5	10	9.75
						9.5	10	9.75
						10	10	9.75
						10	10	9.75
						10	10	9.75
						-	-	-
						-	-	-
						-	-	-
						-	-	-
						-	-	-
						-	-	-
						-	-	-
						-	-	-
						-	-	Examination Assembly
						Eyebolt Assembly	Bit-holder Assembly

## Sheet: Data & Graphics Pre Post
	Pre-Test Quiz						Pre-Test Exercise			Post-Test Quiz
	Control	Experimental		Grupo de Control	Grupo Experimental		Control	Experimental		Control	Experimental
	1.83	0		1	3		2	6		0	0
	3.83	5		1	3		2	6		2.5	5.67								Control Group	Experimental Group
	4.17	5.25		2	3.5		4	7		7	6.83
	4.5	5.75		3	4		6	8		7.5	7.58								Control	Experimental	Difference
	4.58	6.42		4	4		8	8		8	7.67
	5	7.25		4	4		8	8		8.5	8
	5.33	7.92		4	4		8	8		8.5	8.83
	5.42	8		4	4		8	8		8.58	8.83
	6.08	8.17		5	4		10	8		9	9.33
	6.17	8.17		5	4		10	8		9.17	9.5
	6.5	8.42		5	4		10	8		9.17	9.83
	7.17	8.5		5	4		10	8		9.17	10.33
	7.5	8.67		5	4		10	8		9.25	10.5
	7.58	8.83		5	4		10	8		9.5	10.5
	7.83	8.83		5	4		10	8		9.83	10.67
	7.92	8.83		5	4		10	8		9.83	10.75
	8	8.92		5	5		10	10		10.5	10.83
	8	9.08		5	5		10	10		10.5	10.83
	8.42	9.08		5	5		10	10		10.67	11
	8.42	9.33		5	5		10	10		10.67	11.08
	8.58	9.42		5	5		10	10		11.17	11.5
	8.67	9.42		5	5		10	10		11.5	11.67
	8.75	9.67		5	5		10	10		11.75	11.67
	8.75	9.92		5	5		10	10		11.83	11.75
	8.92	10		5	5		10	10		11.92	12
	8.92	10.08		5.5	5		11	10		12.25	12.08
	9	10.33		5.5	5		11	10		12.42	12.17
	9.08	10.42		6	5		12	10		12.5	12.42
	9.25	10.5		6	5		12	10		13	12.5
	9.33	10.58		6	5		12	10		13.5	12.5
	9.33	10.58		6	5.5		12	11		13.58	12.83
	9.58	10.83		6	5.5		12	11		13.92	12.83
	9.75	10.83		6	5.5		12	11		14.58	12.83
	9.92	11.08		6	5.5		12	11		14.67	12.83
	10.08	11.25		6	5.5		12	11		14.83	13.08
	10.17	11.33		6.5	5.5		13	11		15.08	13.17
	10.42	11.42		6.5	5.5		13	11		15.08	13.25
	10.92	11.42		6.5	6		13	12		15.25	13.25
	10.92	11.5		7	6		14	12		15.5	13.33
	11	11.5		7	6		14	12		16.67	13.58
	11	11.67		8	6		16	12		17.17	13.67
	11.83	12.25		-	6		-	12		17.33	14.08
	12.33	12.25		-	6		-	12		17.67	14.08
	12.5	12.33		-	6		-	12		18.33	14.33
	14.5	12.5		-	6		-	12		18.33	14.67
	15.83	12.5		-	6		-	12		20	14.67
	16.5	12.5		-	6		-	12		-	14.83
	-	12.58		-	6		-	12		-	15
	-	12.58		-	6		-	12		-	15.42
	-	13.33		-	6.5		-	13		-	15.5
	-	13.83		-	6.5		-	13		-	15.5									Q-Pre	Ej-Pre	Q-Post						Q-Pre	Ej-Pre	Q-Post
	-	14		-	6.5		-	13		-	15.67								Control Group	8.73	10.18	11.91					Gr. Control	8.73	10.18	11.91
	-	14		-	7		-	14		-	15.83								Experimental Group	12.03	11.52	13.51					Gr. Exp.	12.03	11.52	13.51
	-	14.25		-	7		-	14		-	15.92								Difference	3.3	1.34	1.6					Diferencia	8.3	6.34	6.6
	-	14.33		-	7		-	14		-	16
	-	14.5		-	7		-	14		-	16.33
	-	14.5		-	7		-	14		-	16.33
	-	14.58		-	7		-	14		-	16.67
	-	14.83		-	7		-	14		-	16.75
	-	14.92		-	7		-	14		-	16.83
	-	15.33		-	7		-	14		-	17
	-	15.83		-	7		-	14		-	17.08
	-	16		-	7		-	14		-	17.5
	-	16.17		-	7		-	14		-	17.58
	-	16.33		-	7.5		-	15		-	17.67
	-	16.42		-	7.5		-	15		-	17.67
	-	16.83		-	7.5		-	15		-	18
	-	17		-	7.5		-	15		-	18.5
	-	17.08		-	8.5		-	17		-	18.5
	-	17.08			9			18		-	18.5
		17.08			9			18			18.75
		17.17			9			18			19.25
		17.17			9.5			19			19.67
		17.33			-			-			20
		17.5			-			-			20
		18.08			-			-			-
		19.17			-			-			-
		19.67			-			-			-
		-			-			-			-
		-			-			-			-
		-			-			-			-
		-			-			-			-
		-			-			-			-

## Sheet: Classificacion Quality Metrics
			Precisión	Sensibilidad	Exactitud	Especificidad	F1
			Precision	Recall	Accuracy	Specificity	F1
		QDA	0.863	0.9	0.833	0.687	0.881
		SVC	0.865	0.914	0.843	0.687	0.888

## Sheet: ARPAID Usage
Access # per Student		Total # of students	83
28		Student # who accessed ARPAID	79
26		Mean Access per Student	7.37975
24		Maximum # accesses for a student	28
17
17
15
15
15
14
14
13
13
12
12
12
11
10
10
10
10
10
10
10
9
9
9
9
8
8
8
8
8
8
7
7
7
7
7
7
7
6
6
6
6
6
5
5
5
5
5
4
4
4
3
3
3
3
3
3
3
3
3
2
2
2
2
2
2
2
2
2
2
2
1
1
1
1
1
1
