# Supplementary material
Source: MDPI journal article supplement (https://www.mdpi.com/2071-1050/13/6/3305)
Supplement: s1 [file s1 › Test_Quiz.pdf]

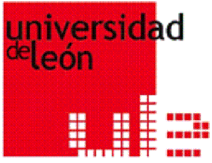

# **ASSESSMENT TEST for MECHANICAL ASSEMBLIES DRAWING**

**Graphic Design in Engineering**  
**UNIVERSITY of LEÓN**

## **PROFESSORS:**

D. Fernando J. Fraile Fernández

Dña. Rebeca Martínez García

|   |                                                                                                                                                                                                                                                                                                                |
|---|----------------------------------------------------------------------------------------------------------------------------------------------------------------------------------------------------------------------------------------------------------------------------------------------------------------|
| 1 | The drawing showing the parts of which a mechanism is composed as well as the relative position between them is called:                                                                                                                                                                                        |
|   | <ul style="list-style-type: none"> <li>A. Detail Drawing</li> <li>B. Mechanism Drawing</li> <li>C. Assembly Drawing</li> <li>D. Position Drawing</li> </ul>                                                                                                                                                    |
| 2 | In an assembly drawing...                                                                                                                                                                                                                                                                                      |
|   | <ul style="list-style-type: none"> <li>A. ...all dimensions are included</li> <li>B. ... no dimensions are added</li> <li>C. ...all mounting dimensions are included</li> <li>D. None of the above</li> </ul>                                                                                                  |
| 3 | In an assembly drawing, the standard elements...                                                                                                                                                                                                                                                               |
|   | <ul style="list-style-type: none"> <li>A. ...are never cut off</li> <li>B. ...are sectioned but the section lines are not drawn</li> <li>C. ...are sectioned if the cut is longitudinal</li> <li>D. ...are sectioned if the cut is transversal</li> </ul>                                                      |
| 4 | In an assembly drawing, for the simplified thread representation, when there is spatial overlapping....                                                                                                                                                                                                        |
|   | <ul style="list-style-type: none"> <li>A. ...external threads prevail over internal threads</li> <li>B. ...the threads are not drawn</li> <li>C. ...internal threads prevail over external threads</li> <li>D. None of the above</li> </ul>                                                                    |
| 5 | Part number(s) is (are)...                                                                                                                                                                                                                                                                                     |
|   | <ul style="list-style-type: none"> <li>A. ...the different elements that make up an assembly</li> <li>B. ...the different elements that make up an subassembly</li> <li>C. ...the number that identifies each part in an assembly</li> <li>D. ...the number of repetitions of a part in an assembly</li> </ul> |

|                                                                                     |                                                                                                                                                                                                                                                |
|-------------------------------------------------------------------------------------|------------------------------------------------------------------------------------------------------------------------------------------------------------------------------------------------------------------------------------------------|
| 6                                                                                   | The standard elements...                                                                                                                                                                                                                       |
|                                                                                     | <p>A. ...do not require a detail drawing</p> <p>B. ...need a detail drawing</p> <p>C. ...do not have part number</p> <p>D. ...are not dimensioned</p>                                                                                          |
| 7                                                                                   | The bill of materials... (mark the correct answers)                                                                                                                                                                                            |
|                                                                                     | <p>A. ...has a variable number of columns</p> <p>B. ...can be included in the drawing or in a separate document</p> <p>C. ...is ordered from top to bottom</p> <p>D. ...must contain as many rows as parts in the assembly</p>                 |
| 8                                                                                   | In a Detail Drawing... (mark the wrong answers)                                                                                                                                                                                                |
|                                                                                     | <p>A. ...it is necessary to make the appropriate views and sections</p> <p>B. ...all dimensional information must be included</p> <p>C. ...it is not necessary to indicate surface finishes</p> <p>D. ...a bill of materials must be added</p> |
| 9                                                                                   | In the mechanism shown in the figure, indicate the degrees of freedom of the middle part                                                                                                                                                       |
| 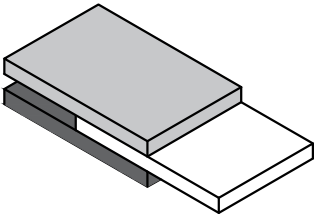 | <p>Translation: X Axis      Y Axis      Z Axis</p> <p>Rotation:    X Axis      Y Axis      Z Axis</p>                                                                                                                                          |
| 10                                                                                  | In the mechanism shown in the figure, indicate the degrees of freedom of the middle part                                                                                                                                                       |
| 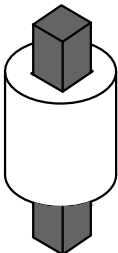 | <p>Translation: X Axis      Y Axis      Z Axis</p> <p>Rotation:    X Axis      Y Axis      Z Axis</p>                                                                                                                                          |

|                                                                                    |                                                                                                                                                         |
|------------------------------------------------------------------------------------|---------------------------------------------------------------------------------------------------------------------------------------------------------|
| 11                                                                                 | In the mechanism shown in the figure, indicate the degrees of freedom of the middle part                                                                |
| 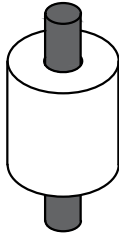  | <p>Translation: X Axis      Y Axis      Z Axis</p> <p>Rotation:    X Axis      Y Axis      Z Axis</p>                                                   |
| 12                                                                                 | In the mechanism shown in the figure, indicate the degrees of freedom of the middle part                                                                |
| 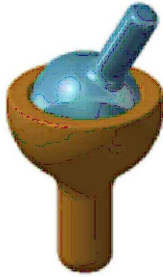  | <p>Translation: X Axis      Y Axis      Z Axis</p> <p>Rotation:    X Axis      Y Axis      Z Axis</p>                                                   |
| 13                                                                                 | In the mechanism shown in the figure, indicate the degrees of freedom of the middle part                                                                |
| 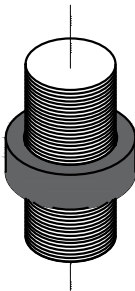 | <p>Translation: X Axis      Y Axis      Z Axis</p> <p>Rotation:    X Axis      Y Axis      Z Axis</p>                                                   |
| 14                                                                                 | In a part, the types of tolerances can be...                                                                                                            |
|                                                                                    | <p>A. ...Positional and Rotational</p> <p>B. ...Dimensional and Geometric</p> <p>C. ...Dimensional and Positional</p> <p>D. ...of Form and Position</p> |
| 15                                                                                 | We say that the dimension of a perfectly shaped geometric element, as defined in the drawing specification, is called....                               |
|                                                                                    | <p>A. ...real or effective dimension</p> <p>B. ...specific dimension</p> <p>C. ...nominal dimension</p> <p>D. ...geometric dimension</p>                |

|    |                                                                                                                                                                                                                                                                               |
|----|-------------------------------------------------------------------------------------------------------------------------------------------------------------------------------------------------------------------------------------------------------------------------------|
| 16 | Tolerance grades are denoted by the international prefix...                                                                                                                                                                                                                   |
|    | <ul style="list-style-type: none"> <li>A. IT</li> <li>B. TO</li> <li>C. TI</li> <li>D. OT</li> </ul>                                                                                                                                                                          |
| 17 | The Fit between two mating parts is defined as the difference between the...                                                                                                                                                                                                  |
|    | <ul style="list-style-type: none"> <li>A. ...nominal dimensions which are related</li> <li>B. ...related deviations</li> <li>C. ...effective or actual dimensions which are related</li> <li>D. ...tolerances which are related</li> </ul>                                    |
| 18 | The tolerances in the drawings are registered...                                                                                                                                                                                                                              |
|    | <ul style="list-style-type: none"> <li>A. ...in the bill of materials</li> <li>B. ...next to the views of the part</li> <li>C. ...in the assembly drawing</li> <li>D. ...in the title block</li> </ul>                                                                        |
| 19 | What does this code stand for? EN-GJMW-400-OS                                                                                                                                                                                                                                 |
|    | <ul style="list-style-type: none"> <li>A. A International Standard</li> <li>B. A Standard Material</li> <li>C. A European Standard</li> <li>D. Standardised designation of a commercial part</li> </ul>                                                                       |
| 20 | The general tolerance of a mechanism depends on...                                                                                                                                                                                                                            |
|    | <ul style="list-style-type: none"> <li>A. ...the range of dimensions of the detail views</li> <li>B. ...the material used</li> <li>C. ...the workshop &amp; the machinery used in the machining process</li> <li>D. ...the skills of the milling or lathe operator</li> </ul> |
